# Supplementary material for: Toward chemical recycling of PU foams: study of the main purification options
Source: Royal Society of Chemistry journal article supplement (doi:10.1039/d3an01909h), 2024-01-01
Supplement: d3an01909h1.pdf [file d3an01909h1.pdf]

## Supplementary Information File for the article:

### Toward chemical recycling of PU foams: purification options

Eleonora Conterosito\*<sup>a</sup>, Marco Monti<sup>b</sup>, Maria Teresa Scrivani<sup>b</sup>, Irene Kociolek<sup>b</sup>, Ilaria Poncini<sup>b</sup>, Chiara Ivaldi<sup>a</sup>,  
Michele Laus<sup>c</sup>, Valentina Gianotti<sup>a</sup>

<sup>a</sup> DISSTE Università del Piemonte Orientale P.zza Sant'Eusebio 5, 13100 Vercelli (VC), Italy

<sup>b</sup> Proplast, Via Roberto di Ferro 86, 15122 Alessandria (AL), Italy

<sup>c</sup> DiSIT, Università del Piemonte Orientale, Via T. Michel 11, 15121 Alessandria (AL), Italy

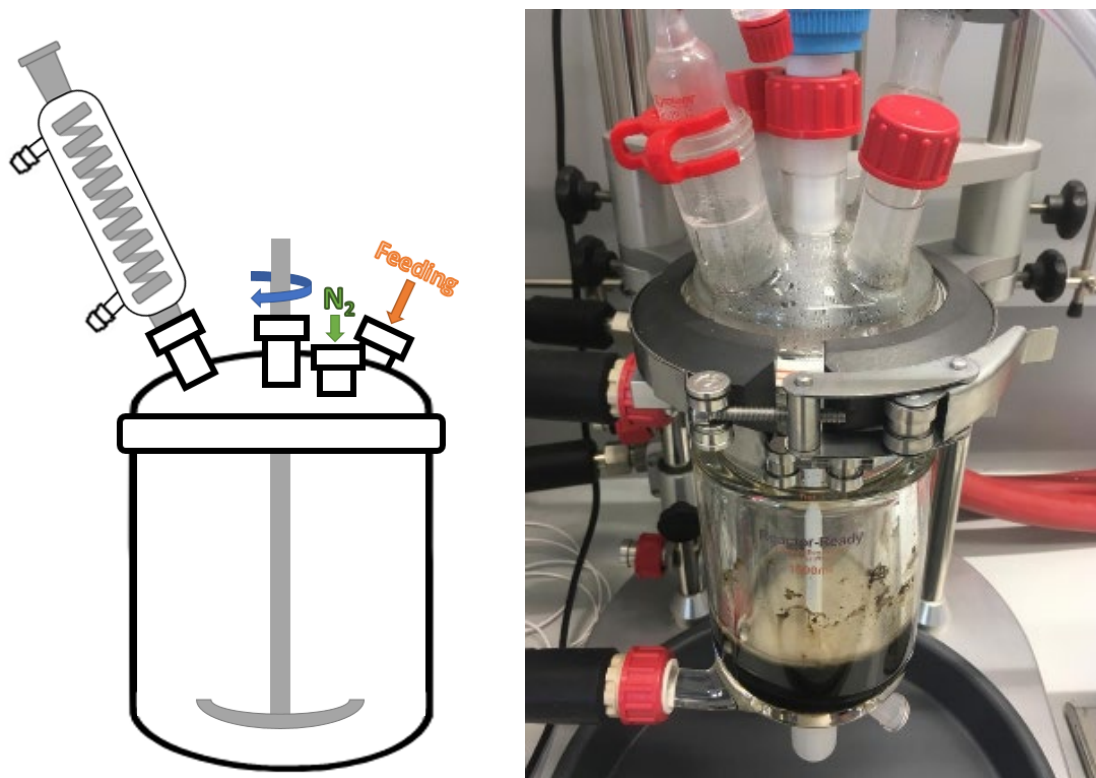

Figure S1 - Reactor scheme and picture

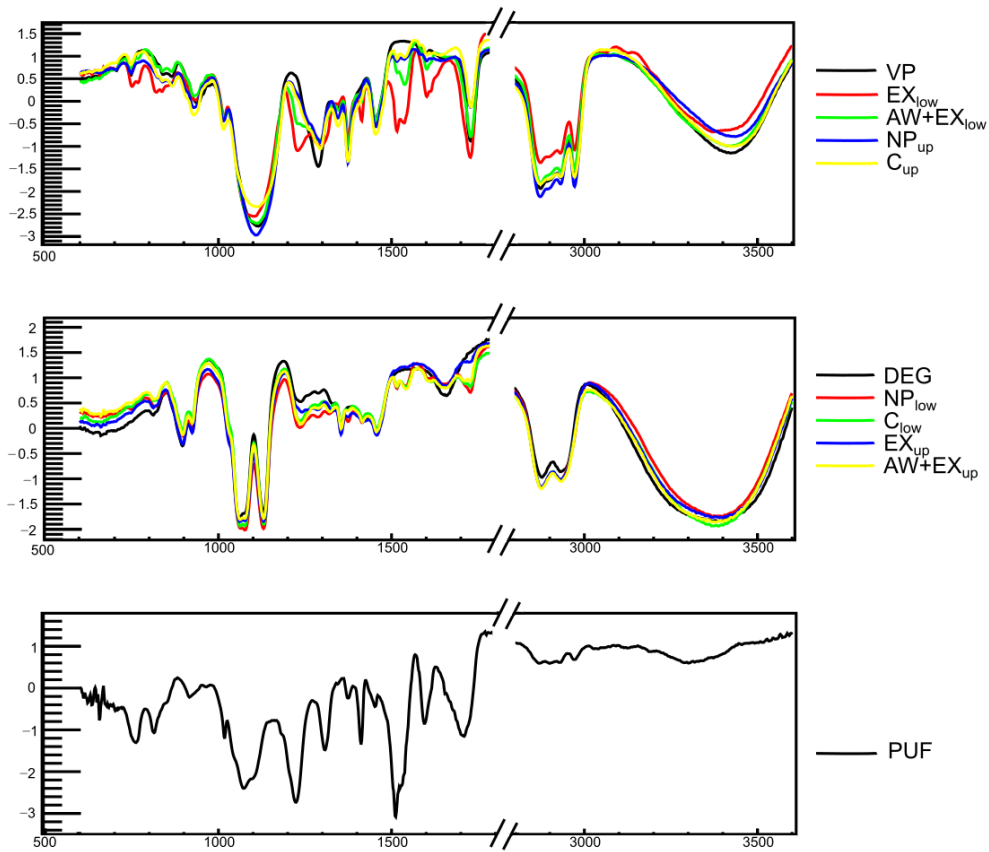

Figure S2 - Results of the clustering analysis of the IR spectra (first dataset).

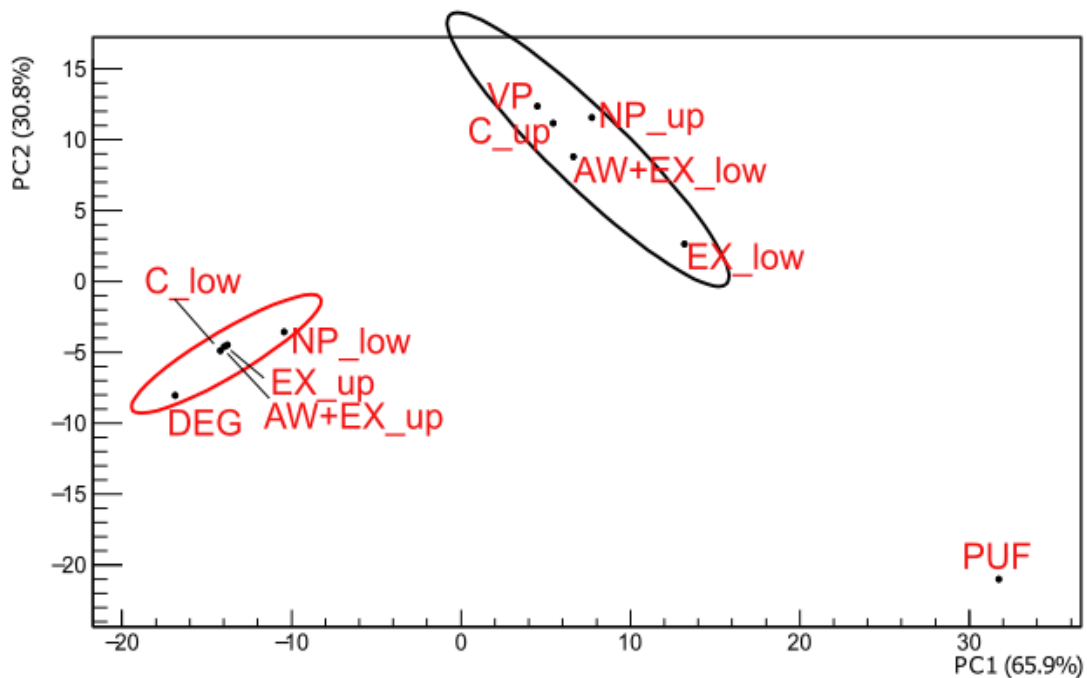

Figure S3 - PCA Score plot (PC1 Vs. PC2) of the first dataset.

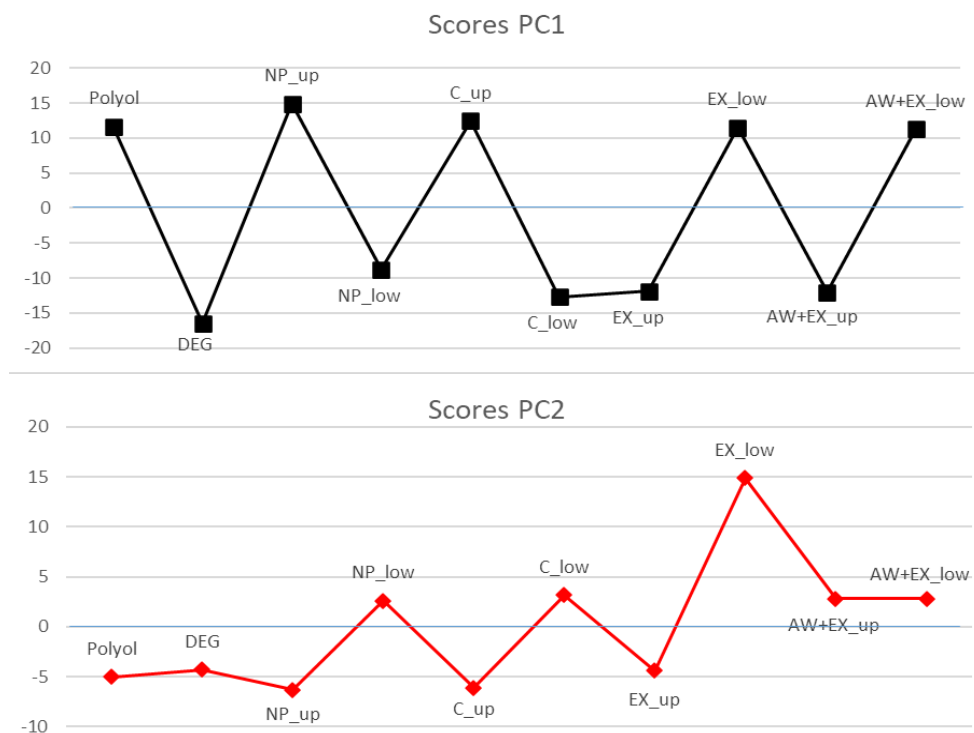

Figure S4 - Score plots of PC1 and PC2 of the second dataset.

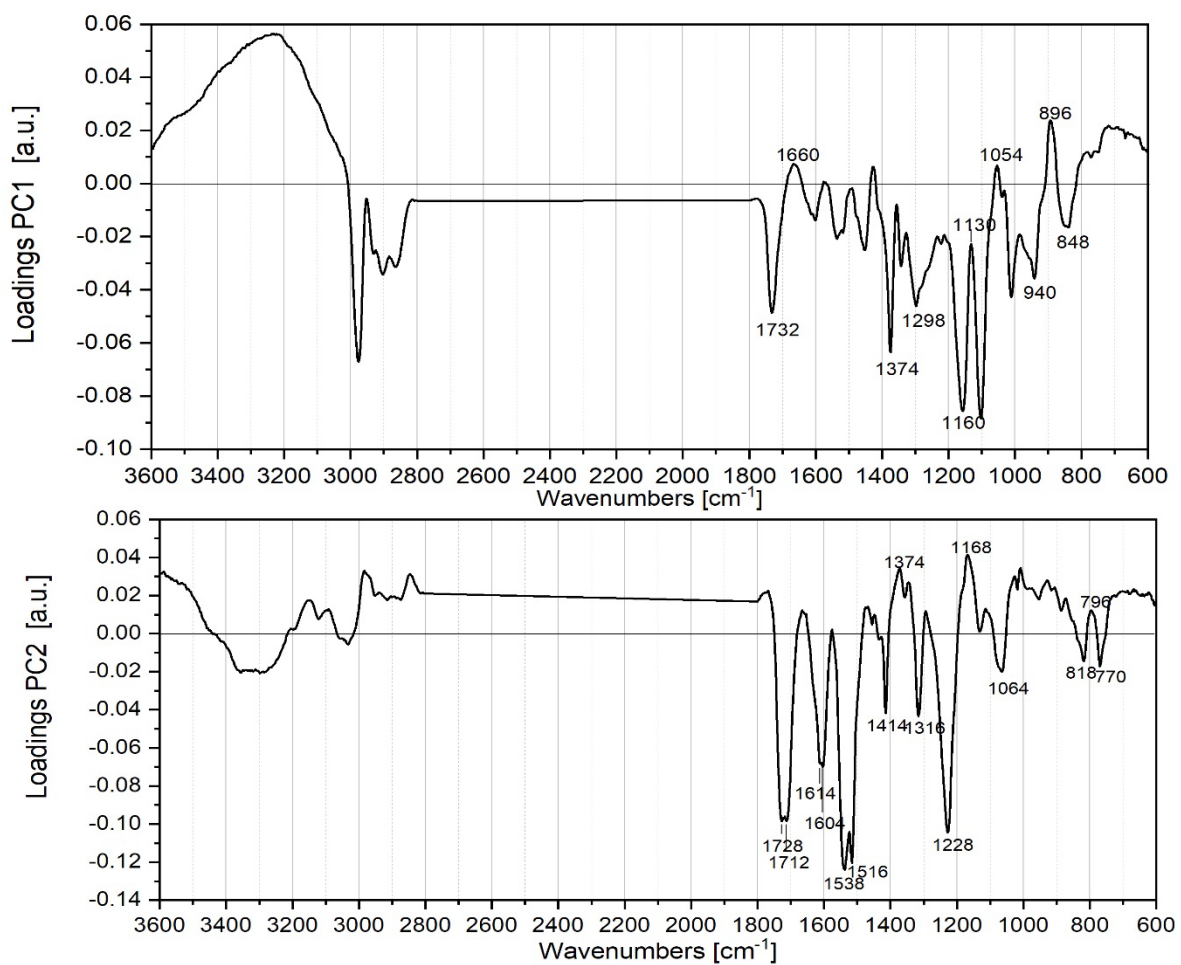

Figure S5 - PCA loading plots of PC1 and PC2 of the second dataset.

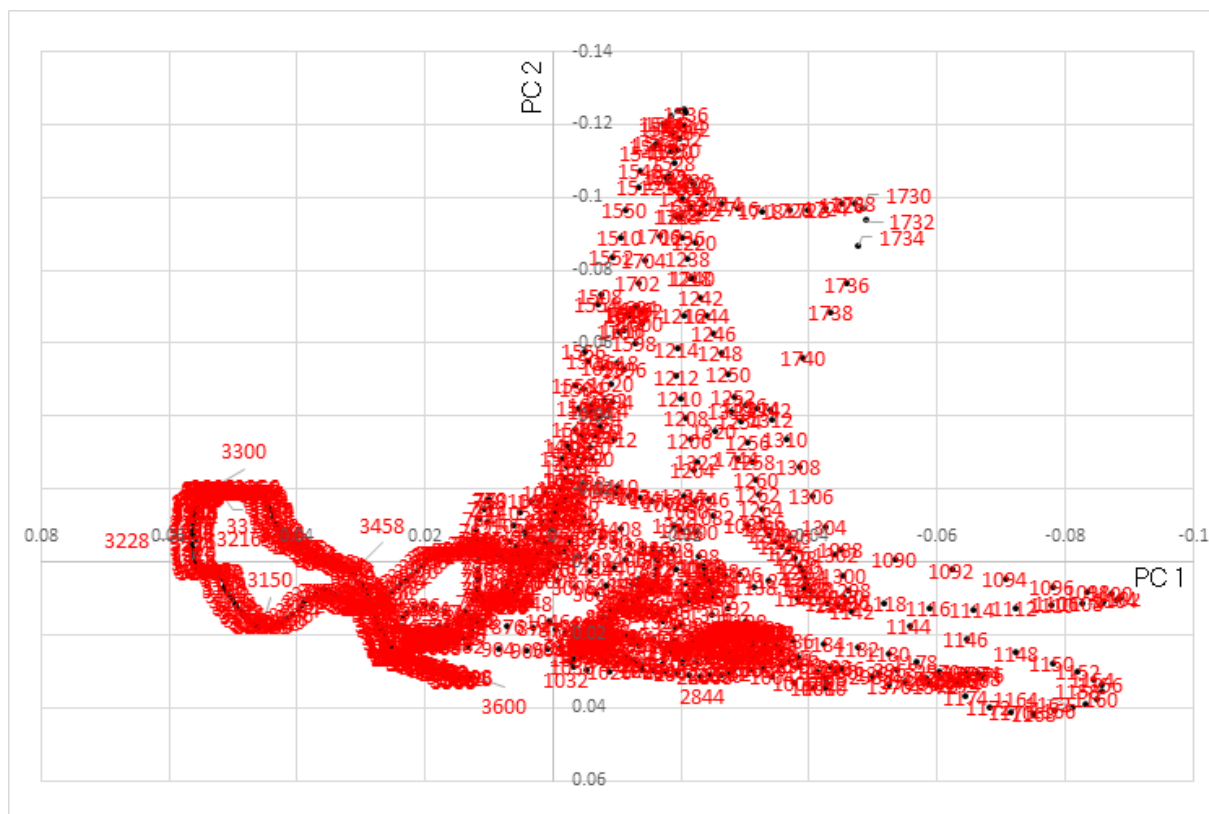

Figure S6 - Loading plot of PC1 vs. PC2 of the second dataset.

| #           | Criterion                                                   | Weight | NP                                                            |       | C                                                             |        | EX                                                            |        | AW+EX                                                         |        |
|-------------|-------------------------------------------------------------|--------|---------------------------------------------------------------|-------|---------------------------------------------------------------|--------|---------------------------------------------------------------|--------|---------------------------------------------------------------|--------|
|             |                                                             |        | Value                                                         | Score | Value2                                                        | Score2 | Value3                                                        | Score3 | Value4                                                        | Score4 |
| 1           | Sample preparation                                          | 2      | Not set                                                       | 1     | Not set                                                       | 1      | Not set                                                       | 1      | Not set                                                       | 1      |
| 2           | Hazardous materials:                                        | 5      | 0 [gor mL]                                                    | 1     | 0 [gor mL]                                                    | 1      | 3 [gor mL]                                                    | 0.17   | 3 [gor mL]                                                    | 0.17   |
| 3           | Sustainability, renewability, and reusability of materials: | 2      | 25-50% of reagents and materials are sustainable or renewable | 0.25  | 25-50% of reagents and materials are sustainable or renewable | 0.25   | 25-50% of reagents and materials are sustainable or renewable | 0.25   | 25-50% of reagents and materials are sustainable or renewable | 0.25   |
| 4           | Waste:                                                      | 3      | 3 [gor mL]                                                    | 0.45  | 3 [gor mL]                                                    | 0.45   | 3 [gor mL]                                                    | 0.45   | 3 [gor mL]                                                    | 0.45   |
| 5           | Size economy of the sample                                  | 1      | Mass or volume of the sample: Not set [gor mL]                | 1     | Mass or volume of the sample: Not set [gor mL]                | 1      | Mass or volume of the sample: Not set [gor mL]                | 1      | Mass or volume of the sample: Not set [gor mL]                | 1      |
| 6           | Sample throughput:                                          | 4      | 0 [samples/h]                                                 | 1     | 15 [samples/h]                                                | 0.64   | 6 [samples/h]                                                 | 0.42   | 6 [samples/h]                                                 | 0.42   |
| 7           | Integration and automation                                  | 5      | Sample prep. steps: 2 steps or fewer, Manual systems          | 0.25  | Sample prep. steps: 2 steps or fewer, Semi-automated systems  | 0.5    | Sample prep. steps: 3 steps, Semi-automated systems           | 0.38   | Sample prep. steps: 4 steps, Semi-automated systems           | 0.25   |
| 8           | Energy consumption:                                         | 4      | 0 [W]                                                         | 1     | 70 [W]                                                        | 0.5    | 0 [W]                                                         | 1      | 0 [W]                                                         | 1      |
| 9           | Post-sample preparation                                     | 3      | Not set                                                       | 1     | Not set                                                       | 1      | Not set                                                       | 1      | Not set                                                       | 1      |
| 10          | Operator's safety:                                          | 3      | No hazards or no exposure                                     | 1     | No hazards or no exposure                                     | 1      | 1 hazard                                                      | 0.75   | 2 hazards                                                     | 0.5    |
| TOTAL SCORE |                                                             |        |                                                               | 0.78  |                                                               | 0.72   |                                                               | 0.58   |                                                               | 0.54   |

Table S1: Details on the AGREEprep scores.
